# Supplementary material for: In situ polymerization of poly(γ-benzyl-l-glutamate) on mesoporous hydroxyapatite with high graft amounts for the direct fabrication of biodegradable cell microcarriers and their osteogenic induction
Source: Royal Society of Chemistry journal article supplement (doi:10.1039/c8tb00232k), 2018-01-01
Supplement: c8tb00232k1.pdf [file c8tb00232k1.pdf]

### Supplementary information

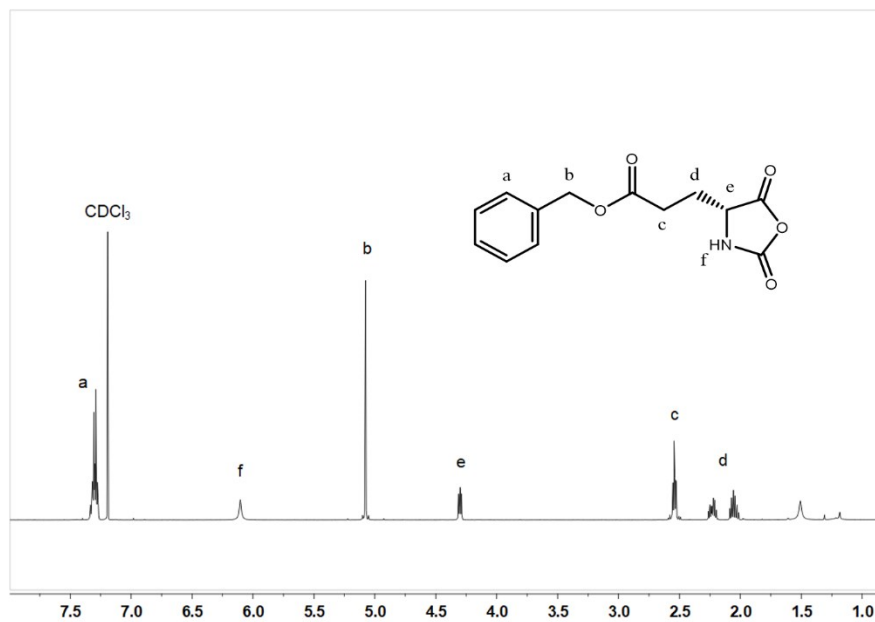

Figure S1. The <sup>1</sup>H-NMR spectra of BLG-NCA monomer in CDCl<sub>3</sub> (300 MHz).

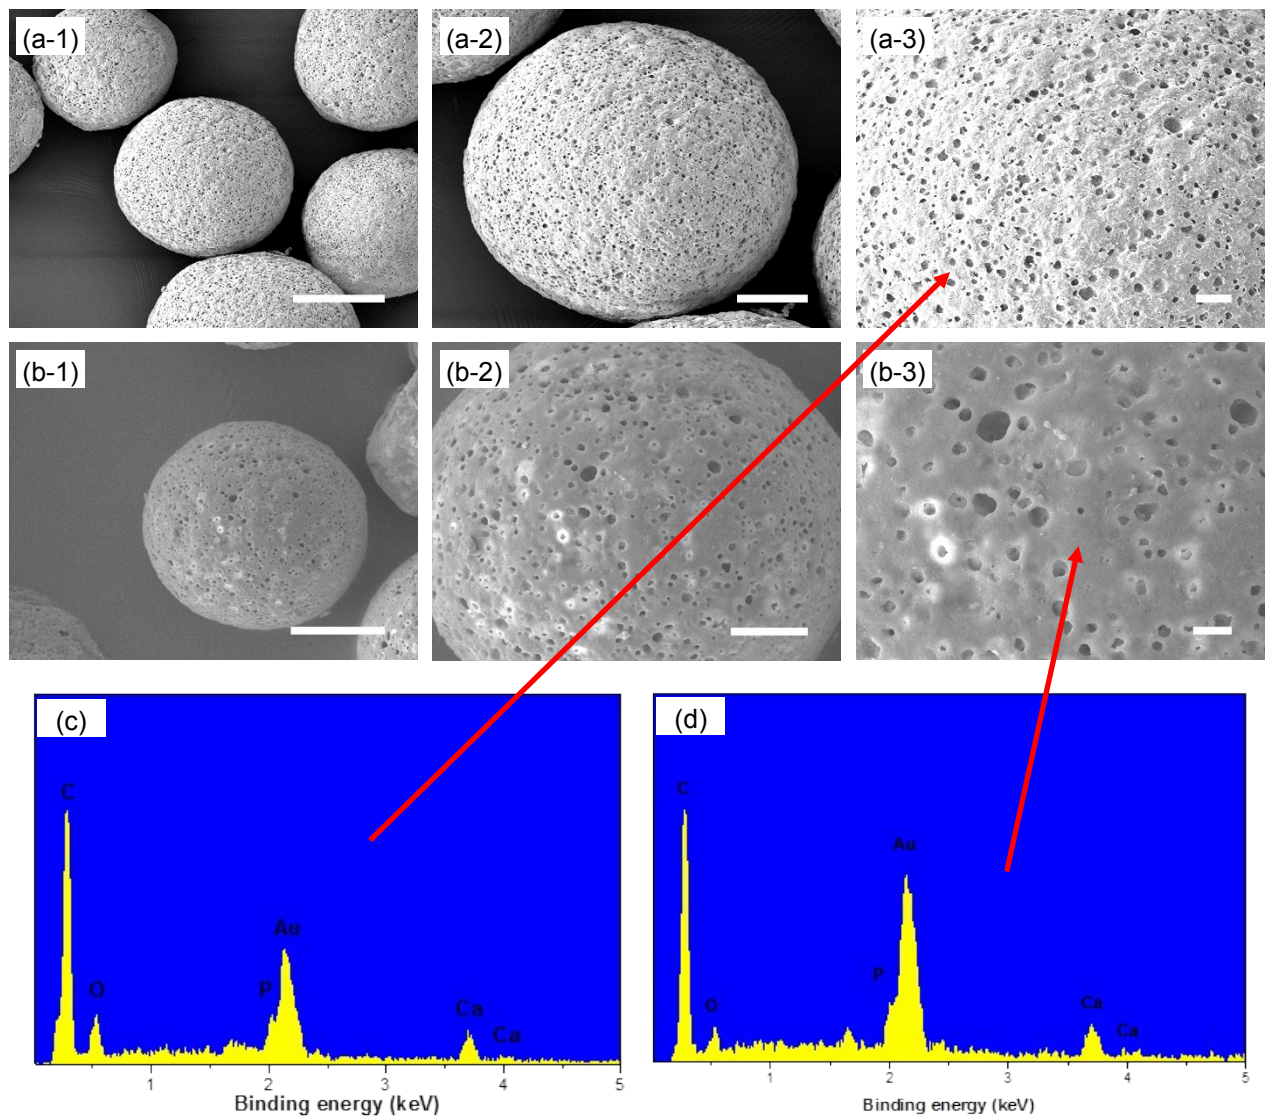

Figure S2. The SEM micrographs and EDX analysis of MHA/PLGA microcarriers with the amounts of 33.12% (a and c) and 50.30% PLGA (b and d) under the solution concentrations of 3%. (-2) and (-3) are the amplified micrographs of (-1). The scale bars are 50  $\mu\text{m}$  (1), 20  $\mu\text{m}$  (2) and 10  $\mu\text{m}$  (3). EDX curves (c and d) showed the element contents of P and Ca on the surfaces of microcarriers (a and b), respectively.

Table S1. Results of N<sub>2</sub> adsorption/desorption isotherms analysis of HA and MHA samples.

| <b>Samples</b> | <b>S<sub>BET</sub> (m<sup>2</sup>/g)</b> | <b>d<sub>p</sub> (nm)</b> | <b>V<sub>p</sub> (cm<sup>3</sup>/g)</b> |
|----------------|------------------------------------------|---------------------------|-----------------------------------------|
| Nano-HA        | 29.553                                   | 13.237                    | 0.237                                   |
| MHA            | 59.099                                   | 27.282                    | 0.437                                   |
